# Supplementary material for: Effect of obesity and exercise on the expression of the novel myokines, Myonectin and Fibronectin type III domain containing 5
Source: PeerJ. 2014 Sep 30;2:e605. doi: 10.7717/peerj.605 (PMC4184026; doi:10.7717/peerj.605)
Supplement: Supplemental Information 1 — Raw data of LDH, HPRT, 18S, FNDC5, and myonectin (FAM132b) in excel format. Each gene data is located on an individual sheet. L, lean; O, obese; A, Exercised; B, Control. [file peerj-02-605-s001.xlsx]

## Sheet: 18S
Well	Fluor	Target	Content	Sample	Cq	Cq Mean	Cq Std. Dev	Starting Quantity (SQ)	Log Starting Quantity	SQ Mean	SQ Std. Dev
A01	SYBR		NTC-01		38.86	39.13	0.376	N/A	N/A	N/A	N/A
A02	SYBR		NTC-01		N/A	0	0	N/A	N/A	0	0
A03	SYBR		NTC-01		39.4	39.13	0.376	N/A	N/A	N/A	N/A
B01	SYBR	18S	Std-01	18S	32.59	32.28	0.328	69.6	1.843	69.6	0
B02	SYBR	18S	Std-01	18S	31.94	32.28	0.328	69.6	1.843	69.6	0
B03	SYBR	18S	Std-01	18S	32.31	32.28	0.328	69.6	1.843	69.6	0
C01	SYBR	18S	Std-02	18S	28.56	28.29	0.259	696	2.843	696	0
C02	SYBR	18S	Std-02	18S	28.05	28.29	0.259	696	2.843	696	0
C03	SYBR	18S	Std-02	18S	28.25	28.29	0.259	696	2.843	696	0
D01	SYBR	18S	Std-03	18S	24.7	24.59	0.105	6960	3.843	6960	0
D02	SYBR	18S	Std-03	18S	24.58	24.59	0.105	6960	3.843	6960	0
D03	SYBR	18S	Std-03	18S	24.5	24.59	0.105	6960	3.843	6960	0
E01	SYBR	18S	Std-04	18S	21.06	20.93	0.109	69600	4.843	69600	0
E02	SYBR	18S	Std-04	18S	20.9	20.93	0.109	69600	4.843	69600	0
E03	SYBR	18S	Std-04	18S	20.85	20.93	0.109	69600	4.843	69600	0
F01	SYBR	18S	Std-05	18S	17.77	17.7	0.094	696000	5.843	696000	0
F02	SYBR	18S	Std-05	18S	17.72	17.7	0.094	696000	5.843	696000	0
F03	SYBR	18S	Std-05	18S	17.59	17.7	0.094	696000	5.843	696000	0
G01	SYBR	18S	Std-06	18S	13.88	13.75	0.107	6960000	6.843	6960000	0
G02	SYBR	18S	Std-06	18S	13.68	13.75	0.107	6960000	6.843	6960000	0
G03	SYBR	18S	Std-06	18S	13.71	13.75	0.107	6960000	6.843	6960000	0
H01	SYBR	18S	Std-07	18S	10.14	10.07	0.063	69600000	7.843	69600000	0
H02	SYBR	18S	Std-07	18S	10.03	10.07	0.063	69600000	7.843	69600000	0
H03	SYBR	18S	Std-07	18S	10.02	10.07	0.063	69600000	7.843	69600000	0			18S
B04	SYBR		Unkn	L3B (24)	7.96	7.96	0	265300000	8.424	265000000	0		L3B (24)	2.81367e+08
B05	SYBR		Unkn	L3B (24)	7.88	7.88	0	279300000	8.446	279000000	0		L1B (22)	2.28033e+08
B06	SYBR		Unkn	L3B (24)	7.77	7.77	0	299500000	8.476	300000000	0		L4B (25)	413000000
A04	SYBR		Unkn-01	L1B (22)	8.24	8.21	0.089	223000000	8.348	228000000	13000000		L5B (26)	394000000
A05	SYBR		Unkn-01	L1B (22)	8.27	8.21	0.089	218300000	8.339	228000000	13000000		L7B (27)	305000000
A06	SYBR		Unkn-01	L1B (22)	8.11	8.21	0.089	242800000	8.385	228000000	13000000		L11B (31)	333000000
C04	SYBR		Unkn-03	L4B (25)	7.31	7.26	0.061	399000000	8.601	413000000	15900000		L1A (5)	336000000
C05	SYBR		Unkn-03	L4B (25)	7.27	7.26	0.061	409800000	8.613	413000000	15900000		L3A (7)	443000000
C06	SYBR		Unkn-03	L4B (25)	7.19	7.26	0.061	430300000	8.634	413000000	15900000		L4A (8)	326000000
D04	SYBR		Unkn-04	L5B (26)	7.49	7.34	0.136	357200000	8.553	394000000	33100000		L5A (11)	405000000
D05	SYBR		Unkn-04	L5B (26)	7.29	7.34	0.136	404500000	8.607	394000000	33100000		L7A (13)	357000000
D06	SYBR		Unkn-04	L5B (26)	7.23	7.34	0.136	421000000	8.624	394000000	33100000		L11A (9)	343000000
E04	SYBR		Unkn-05	L7B (27)	7.99	7.76	0.241	260300000	8.415	305000000	46100000		F4B (33)	378000000
E05	SYBR		Unkn-05	L7B (27)	7.51	7.76	0.241	352300000	8.547	305000000	46100000		F5B (34)	424000000
E06	SYBR		Unkn-05	L7B (27)	7.76	7.76	0.241	301800000	8.48	305000000	46100000		F6B (35)	362000000
F04	SYBR		Unkn-06	L11B (31)	7.72	7.6	0.102	309600000	8.491	333000000	21100000		F7B (10)	359000000
F05	SYBR		Unkn-06	L11B (31)	7.57	7.6	0.102	338900000	8.53	333000000	21100000		F8B (36)	290000000
F06	SYBR		Unkn-06	L11B (31)	7.52	7.6	0.102	350500000	8.545	333000000	21100000		F13B (39)	339000000
G04	SYBR		Unkn-07	L1A (5)	7.52	7.59	0.068	351100000	8.545	336000000	14400000		F4A (16)	483000000
G05	SYBR		Unkn-07	L1A (5)	7.65	7.59	0.068	322600000	8.509	336000000	14400000		F5A (2)	508000000
G06	SYBR		Unkn-07	L1A (5)	7.6	7.59	0.068	333500000	8.523	336000000	14400000		F6A (3)	506000000
H04	SYBR		Unkn-08	L3A (7)	7.23	7.15	0.067	421400000	8.625	443000000	18500000		F7A (4)	733000000
H05	SYBR		Unkn-08	L3A (7)	7.1	7.15	0.067	456100000	8.659	443000000	18500000		F8A (17)	357000000
H06	SYBR		Unkn-08	L3A (7)	7.12	7.15	0.067	450200000	8.653	443000000	18500000		F13A (19)	509000000
A07	SYBR		Unkn-09	L4A (8)	7.56	7.64	0.15	343000000	8.535	326000000	29800000			Mean
A08	SYBR		Unkn-09	L4A (8)	7.81	7.64	0.15	291600000	8.465	326000000	29800000		Lean Control	3.25733e+08
A09	SYBR		Unkn-09	L4A (8)	7.55	7.64	0.15	343200000	8.536	326000000	29800000		Lean Trained	3.68333e+08
B07	SYBR		Unkn-10	L5A (11)	7.16	7.29	0.121	439400000	8.643	405000000	31100000		Obese Control	3.58667e+08
B08	SYBR		Unkn-10	L5A (11)	7.4	7.29	0.121	379000000	8.579	405000000	31100000		Obese Trained	516000000
B09	SYBR		Unkn-10	L5A (11)	7.33	7.29	0.121	396200000	8.598	405000000	31100000			SD
C07	SYBR		Unkn-11	L7A (13)	7.51	7.5	0.096	352200000	8.547	357000000	21600000		Lean Control	6.96738e+07
C08	SYBR		Unkn-11	L7A (13)	7.39	7.5	0.096	380000000	8.58	357000000	21600000		Lean Trained	4.58854e+07
C09	SYBR		Unkn-11	L7A (13)	7.58	7.5	0.096	337400000	8.528	357000000	21600000		Obese Control	4.41709e+07
D07	SYBR		Unkn-12	L11A (9)	7.66	7.56	0.088	321800000	8.508	343000000	18800000		Obese Trained	1.21385e+08
D08	SYBR		Unkn-12	L11A (9)	7.49	7.56	0.088	357400000	8.553	343000000	18800000
D09	SYBR		Unkn-12	L11A (9)	7.52	7.56	0.088	350100000	8.544	343000000	18800000
E07	SYBR		Unkn-13	F4B (33)	7.38	7.4	0.036	383500000	8.584	378000000	8510000
E08	SYBR		Unkn-13	F4B (33)	7.44	7.4	0.036	368400000	8.566	378000000	8510000
E09	SYBR		Unkn-13	F4B (33)	7.38	7.4	0.036	382800000	8.583	378000000	8510000
F07	SYBR		Unkn-14	F5B (34)	7.22	7.22	0.035	424600000	8.628	424000000	9210000
F08	SYBR		Unkn-14	F5B (34)	7.26	7.22	0.035	413900000	8.617	424000000	9210000
F09	SYBR		Unkn-14	F5B (34)	7.19	7.22	0.035	432300000	8.636	424000000	9210000
G07	SYBR		Unkn-15	F6B (35)	7.51	7.47	0.039	352400000	8.547	362000000	8760000
G08	SYBR		Unkn-15	F6B (35)	7.44	7.47	0.039	368900000	8.567	362000000	8760000
G09	SYBR		Unkn-15	F6B (35)	7.45	7.47	0.039	365600000	8.563	362000000	8760000
H07	SYBR		Unkn-16	F7B (10)	7.44	7.48	0.038	369200000	8.567	359000000	8710000
H08	SYBR		Unkn-16	F7B (10)	7.51	7.48	0.038	353900000	8.549	359000000	8710000
H09	SYBR		Unkn-16	F7B (10)	7.5	7.48	0.038	354300000	8.549	359000000	8710000
A10	SYBR		Unkn-17	F8B (36)	7.82	7.82	0.055	291300000	8.464	290000000	9920000
A11	SYBR		Unkn-17	F8B (36)	7.77	7.82	0.055	299400000	8.476	290000000	9920000
A12	SYBR		Unkn-17	F8B (36)	7.88	7.82	0.055	279600000	8.447	290000000	9920000
B10	SYBR		Unkn-18	F13B (39)	7.55	7.58	0.035	344200000	8.537	339000000	7510000
B11	SYBR		Unkn-18	F13B (39)	7.62	7.58	0.035	330200000	8.519	339000000	7510000
B12	SYBR		Unkn-18	F13B (39)	7.56	7.58	0.035	341900000	8.534	339000000	7510000
C10	SYBR		Unkn-19	F4A (16)	7.02	7.01	0.048	480500000	8.682	483000000	14700000
C11	SYBR		Unkn-19	F4A (16)	6.96	7.01	0.048	499300000	8.698	483000000	14700000
C12	SYBR		Unkn-19	F4A (16)	7.05	7.01	0.048	470300000	8.672	483000000	14700000
D10	SYBR		Unkn-20	F5A (2)	6.96	6.93	0.112	499800000	8.699	508000000	35900000
D11	SYBR		Unkn-20	F5A (2)	6.81	6.93	0.112	546900000	8.738	508000000	35900000
D12	SYBR		Unkn-20	F5A (2)	7.03	6.93	0.112	476300000	8.678	508000000	35900000
E10	SYBR		Unkn-21	F6A (3)	6.93	6.94	0.103	507600000	8.705	506000000	32700000
E11	SYBR		Unkn-21	F6A (3)	6.84	6.94	0.103	537500000	8.73	506000000	32700000
E12	SYBR		Unkn-21	F6A (3)	7.05	6.94	0.103	472100000	8.674	506000000	32700000
F10	SYBR		Unkn-22	F7A (4)	6.36	6.35	0.058	725200000	8.86	733000000	27000000
F11	SYBR		Unkn-22	F7A (4)	6.28	6.35	0.058	763200000	8.883	733000000	27000000
F12	SYBR		Unkn-22	F7A (4)	6.4	6.35	0.058	711000000	8.852	733000000	27000000
G10	SYBR		Unkn-23	F8A (17)	7.49	7.49	0.039	357600000	8.553	357000000	8630000
G11	SYBR		Unkn-23	F8A (17)	7.46	7.49	0.039	365000000	8.562	357000000	8630000
G12	SYBR		Unkn-23	F8A (17)	7.53	7.49	0.039	347800000	8.541	357000000	8630000
H10	SYBR		Unkn-24	F13A (19)	6.94	6.93	0.019	504800000	8.703	509000000	6000000
H11	SYBR		Unkn-24	F13A (19)	6.91	6.93	0.019	515600000	8.712	509000000	6000000
H12	SYBR		Unkn-24	F13A (19)	6.94	6.93	0.019	505600000	8.704	509000000	6000000

## Sheet: Fam132b
Well	Fluor	Target	Content	Sample	Cq	Cq Mean	Cq Std. Dev	Starting Quantity (SQ)	Log Starting Quantity	SQ Mean	SQ Std. Dev
A01	SYBR		NTC-01		39.92	37.47	3.883	N/A	N/A	N/A	N/A
A02	SYBR		NTC-01		39.49	37.47	3.883	N/A	N/A	N/A	N/A
A03	SYBR		NTC-01		32.99	37.47	3.883	N/A	N/A	N/A	N/A
B01	SYBR	Fam132b	Std-01	Fam132b	32.84	32.84	0	76.6	1.884	76.6	0
C01	SYBR	Fam132b	Std-02	Fam132b	29.91	29.81	0.231	766	2.884	766	0
C02	SYBR	Fam132b	Std-02	Fam132b	29.98	29.81	0.231	766	2.884	766	0
C03	SYBR	Fam132b	Std-02	Fam132b	29.55	29.81	0.231	766	2.884	766	0
D01	SYBR	Fam132b	Std-03	Fam132b	26.14	26.04	0.102	7660	3.884	7660	0
D02	SYBR	Fam132b	Std-03	Fam132b	26.06	26.04	0.102	7660	3.884	7660	0
D03	SYBR	Fam132b	Std-03	Fam132b	25.93	26.04	0.102	7660	3.884	7660	0
E01	SYBR	Fam132b	Std-04	Fam132b	22.63	22.52	0.102	76600	4.884	76600	0
E02	SYBR	Fam132b	Std-04	Fam132b	22.47	22.52	0.102	76600	4.884	76600	0
E03	SYBR	Fam132b	Std-04	Fam132b	22.45	22.52	0.102	76600	4.884	76600	0
F01	SYBR	Fam132b	Std-05	Fam132b	19.19	19.13	0.088	766000	5.884	766000	0
F02	SYBR	Fam132b	Std-05	Fam132b	19.16	19.13	0.088	766000	5.884	766000	0
F03	SYBR	Fam132b	Std-05	Fam132b	19.03	19.13	0.088	766000	5.884	766000	0			Fam132b
B04	SYBR		Unkn	L3B (24)	27.12	27.12	0	3933	3.595	3930	0		L3B (24)	4233.67
B05	SYBR		Unkn	L3B (24)	26.99	26.99	0	4296	3.633	4300	0		L1B (22)	4716.67
B06	SYBR		Unkn	L3B (24)	26.93	26.93	0	4472	3.651	4470	0		L4B (25)	6860
A04	SYBR		Unkn-01	L1B (22)	26.94	26.85	0.091	4424	3.646	4720	278		L5B (26)	4830
A05	SYBR		Unkn-01	L1B (22)	26.84	26.85	0.091	4748	3.677	4720	278		L7B (27)	3890
A06	SYBR		Unkn-01	L1B (22)	26.76	26.85	0.091	4978	3.697	4720	278		L11B (31)	5310
C04	SYBR		Unkn-03	L4B (25)	26.29	26.28	0.051	6780	3.831	6860	229		L1A (5)	2240
C05	SYBR		Unkn-03	L4B (25)	26.32	26.28	0.051	6683	3.825	6860	229		L3A (7)	4560
C06	SYBR		Unkn-03	L4B (25)	26.22	26.28	0.051	7119	3.852	6860	229		L4A (8)	2910
D04	SYBR		Unkn-04	L5B (26)	26.95	26.81	0.125	4398	3.643	4830	390		L5A (11)	3660
D05	SYBR		Unkn-04	L5B (26)	26.77	26.81	0.125	4959	3.695	4830	390		L7A (13)	2950
D06	SYBR		Unkn-04	L5B (26)	26.71	26.81	0.125	5147	3.712	4830	390		L11A (9)	2900
E04	SYBR		Unkn-05	L7B (27)	27.19	27.14	0.055	3759	3.575	3890	141		F4B (33)	8680
E05	SYBR		Unkn-05	L7B (27)	27.14	27.14	0.055	3884	3.589	3890	141		F5B (34)	4210
E06	SYBR		Unkn-05	L7B (27)	27.08	27.14	0.055	4041	3.606	3890	141		F6B (35)	6720
F04	SYBR		Unkn-06	L11B (31)	26.77	26.67	0.1	4957	3.695	5310	346		F7B (10)	8900
F05	SYBR		Unkn-06	L11B (31)	26.57	26.67	0.1	5650	3.752	5310	346		F8B (36)	6950
F06	SYBR		Unkn-06	L11B (31)	26.66	26.67	0.1	5315	3.725	5310	346		F13B (39)	10500
G04	SYBR		Unkn-07	L1A (5)	27.94	27.98	0.083	2297	3.361	2240	121		F4A (16)	5690
G05	SYBR		Unkn-07	L1A (5)	27.92	27.98	0.083	2326	3.367	2240	121		F5A (2)	5810
G06	SYBR		Unkn-07	L1A (5)	28.08	27.98	0.083	2104	3.323	2240	121		F6A (3)	1290
H04	SYBR		Unkn-08	L3A (7)	27.02	26.9	0.106	4208	3.624	4560	312		F7A (4)	8670
H05	SYBR		Unkn-08	L3A (7)	26.82	26.9	0.106	4788	3.68	4560	312		F8A (17)	7560
H06	SYBR		Unkn-08	L3A (7)	26.85	26.9	0.106	4698	3.672	4560	312		F13A (19)	4660
A07	SYBR		Unkn-09	L4A (8)	27.52	27.58	0.076	3034	3.482	2910	143			Mean
A08	SYBR		Unkn-09	L4A (8)	27.67	27.58	0.076	2752	3.44	2910	143		Lean Control	4973.39
A09	SYBR		Unkn-09	L4A (8)	27.57	27.58	0.076	2940	3.468	2910	143		Lean Trained	3203.33	0.00819093
B07	SYBR		Unkn-10	L5A (11)	27.23	27.23	0.009	3668	3.564	3660	21.6		Obese Control	7660
B08	SYBR		Unkn-10	L5A (11)	27.24	27.23	0.009	3634	3.56	3660	21.6		Obese Trained	5613.33	0.175099
B09	SYBR		Unkn-10	L5A (11)	27.23	27.23	0.009	3674	3.565	3660	21.6			SD
C07	SYBR		Unkn-11	L7A (13)	27.6	27.57	0.168	2878	3.459	2950	330		Lean Control	1046.9
C08	SYBR		Unkn-11	L7A (13)	27.38	27.57	0.168	3316	3.521	2950	330		Lean Trained	802.413
C09	SYBR		Unkn-11	L7A (13)	27.71	27.57	0.168	2670	3.427	2950	330		Obese Control	2187.87
D07	SYBR		Unkn-12	L11A (9)	27.61	27.59	0.024	2852	3.455	2900	46.1		Obese Trained	2560.36
D08	SYBR		Unkn-12	L11A (9)	27.57	27.59	0.024	2943	3.469	2900	46.1
D09	SYBR		Unkn-12	L11A (9)	27.58	27.59	0.024	2910	3.464	2900	46.1
E07	SYBR		Unkn-13	F4B (33)	25.89	25.92	0.024	8811	3.945	8680	137
E08	SYBR		Unkn-13	F4B (33)	25.94	25.92	0.024	8538	3.931	8680	137
E09	SYBR		Unkn-13	F4B (33)	25.91	25.92	0.024	8697	3.939	8680	137
F07	SYBR		Unkn-14	F5B (34)	26.97	27.02	0.054	4346	3.638	4210	150
F08	SYBR		Unkn-14	F5B (34)	27.01	27.02	0.054	4245	3.628	4210	150
F09	SYBR		Unkn-14	F5B (34)	27.08	27.02	0.054	4051	3.608	4210	150
G07	SYBR		Unkn-15	F6B (35)	26.37	26.31	0.055	6467	3.811	6720	242
G08	SYBR		Unkn-15	F6B (35)	26.3	26.31	0.055	6753	3.83	6720	242
G09	SYBR		Unkn-15	F6B (35)	26.26	26.31	0.055	6948	3.842	6720	242
H07	SYBR		Unkn-16	F7B (10)	25.92	25.88	0.04	8637	3.936	8900	233
H08	SYBR		Unkn-16	F7B (10)	25.87	25.88	0.04	8971	3.953	8900	233
H09	SYBR		Unkn-16	F7B (10)	25.85	25.88	0.04	9084	3.958	8900	233
A10	SYBR		Unkn-17	F8B (36)	26.26	26.26	0.119	6944	3.842	6950	539
A11	SYBR		Unkn-17	F8B (36)	26.14	26.26	0.119	7493	3.875	6950	539
A12	SYBR		Unkn-17	F8B (36)	26.38	26.26	0.119	6414	3.807	6950	539
B10	SYBR		Unkn-18	F13B (39)	25.68	25.63	0.057	10150	4.006	10500	395
B11	SYBR		Unkn-18	F13B (39)	25.57	25.63	0.057	10910	4.038	10500	395
B12	SYBR		Unkn-18	F13B (39)	25.65	25.63	0.057	10370	4.016	10500	395
C10	SYBR		Unkn-19	F4A (16)	26.51	26.56	0.046	5873	3.769	5690	171
C11	SYBR		Unkn-19	F4A (16)	26.57	26.56	0.046	5668	3.753	5690	171
C12	SYBR		Unkn-19	F4A (16)	26.6	26.56	0.046	5534	3.743	5690	171
D10	SYBR		Unkn-20	F5A (2)	26.63	26.53	0.084	5451	3.736	5810	316
D11	SYBR		Unkn-20	F5A (2)	26.49	26.53	0.084	5949	3.774	5810	316
D12	SYBR		Unkn-20	F5A (2)	26.47	26.53	0.084	6037	3.781	5810	316
E10	SYBR		Unkn-21	F6A (3)	28.78	28.83	0.043	1325	3.122	1290	36.7
E11	SYBR		Unkn-21	F6A (3)	28.87	28.83	0.043	1253	3.098	1290	36.7
E12	SYBR		Unkn-21	F6A (3)	28.84	28.83	0.043	1278	3.106	1290	36.7
F10	SYBR		Unkn-22	F7A (4)	25.95	25.92	0.1	8482	3.929	8670	576
F11	SYBR		Unkn-22	F7A (4)	25.81	25.92	0.1	9316	3.969	8670	576
F12	SYBR		Unkn-22	F7A (4)	26	25.92	0.1	8211	3.914	8670	576
G10	SYBR		Unkn-23	F8A (17)	26.1	26.13	0.025	7680	3.885	7560	123
G11	SYBR		Unkn-23	F8A (17)	26.15	26.13	0.025	7435	3.871	7560	123
G12	SYBR		Unkn-23	F8A (17)	26.13	26.13	0.025	7570	3.879	7560	123
H10	SYBR		Unkn-24	F13A (19)	26.92	26.87	0.059	4481	3.651	4660	181
H11	SYBR		Unkn-24	F13A (19)	26.81	26.87	0.059	4842	3.685	4660	181
H12	SYBR		Unkn-24	F13A (19)	26.87	26.87	0.059	4651	3.668	4660	181

## Sheet: FNDc5
Well	Fluor	Target	Content	Sample	Cq	Cq Mean	Cq Std. Dev	Starting Quantity (SQ)	Log Starting Quantity	SQ Mean	SQ Std. Dev
A01	SYBR		NTC-01		N/A	0	0	N/A	N/A	0	0
A02	SYBR		NTC-01		N/A	0	0	N/A	N/A	0	0
A03	SYBR		NTC-01		N/A	0	0	N/A	N/A	0	0
B02	SYBR		Std-01	Fndc5	33.65	33.63	0.021	61.8	1.791	61.8	0
B03	SYBR		Std-01	Fndc5	33.62	33.63	0.021	61.8	1.791	61.8	0
C02	SYBR		Std-02	Fndc5	29.96	29.82	0.205	618	2.791	618	0
C03	SYBR		Std-02	Fndc5	29.67	29.82	0.205	618	2.791	618	0
D02	SYBR		Std-03	Fndc5	26.44	26.36	0.106	6180	3.791	6180	0
D03	SYBR		Std-03	Fndc5	26.29	26.36	0.106	6180	3.791	6180	0
E01	SYBR		Std-04	Fndc5	22.41	22.24	0.151	61800	4.791	61800	0
E02	SYBR		Std-04	Fndc5	22.2	22.24	0.151	61800	4.791	61800	0
E03	SYBR		Std-04	Fndc5	22.11	22.24	0.151	61800	4.791	61800	0
F01	SYBR		Std-05	Fndc5	18.93	18.82	0.157	618000	5.791	618000	0
F02	SYBR		Std-05	Fndc5	18.9	18.82	0.157	618000	5.791	618000	0
F03	SYBR		Std-05	Fndc5	18.64	18.82	0.157	618000	5.791	618000	0
G01	SYBR		Std-06	Fndc5	15.54	15.43	0.157	6180000	6.791	6180000	0
G02	SYBR		Std-06	Fndc5	15.32	15.43	0.157	6180000	6.791	6180000	0
H01	SYBR		Std-07	Fndc5	12.02	11.91	0.118	61800000	7.791	61800000	0
H02	SYBR		Std-07	Fndc5	11.92	11.91	0.118	61800000	7.791	61800000	0
H03	SYBR		Std-07	Fndc5	11.79	11.91	0.118	61800000	7.791	61800000	0			Fndc5
B04	SYBR		Unkn	L3B (24)	22.65	22.65	0	59190	4.772	59200	0		L3B (24)	62716.7
B05	SYBR		Unkn	L3B (24)	22.53	22.53	0	63640	4.804	63600	0		L1B (22)	49696.7
B06	SYBR		Unkn	L3B (24)	22.49	22.49	0	65320	4.815	65300	0		L4B (25)	69700
A04	SYBR		Unkn-01	L1B (22)	23.02	22.92	0.088	46740	4.67	49700	2780		L5B (26)	69300
A05	SYBR		Unkn-01	L1B (22)	22.91	22.92	0.088	50090	4.7	49700	2780		L7B (27)	66900
A06	SYBR		Unkn-01	L1B (22)	22.84	22.92	0.088	52260	4.718	49700	2780		L11B (31)	64900
C04	SYBR		Unkn-03	L4B (25)	22.46	22.39	0.082	66540	4.823	69700	3660		L1A (5)	57800
C05	SYBR		Unkn-03	L4B (25)	22.41	22.39	0.082	68970	4.839	69700	3660		L3A (7)	69500
C06	SYBR		Unkn-03	L4B (25)	22.3	22.39	0.082	73740	4.868	69700	3660		L4A (8)	58400
D04	SYBR		Unkn-04	L5B (26)	22.52	22.4	0.103	64250	4.808	69300	4480		L5A (11)	72900
D05	SYBR		Unkn-04	L5B (26)	22.36	22.4	0.103	70910	4.851	69300	4480		L7A (13)	61900
D06	SYBR		Unkn-04	L5B (26)	22.32	22.4	0.103	72760	4.862	69300	4480		L11A (9)	48400
E04	SYBR		Unkn-05	L7B (27)	22.61	22.46	0.128	60770	4.784	66900	5340		F4B (33)	79000
E05	SYBR		Unkn-05	L7B (27)	22.39	22.46	0.128	69730	4.843	66900	5340		F5B (34)	89300
E06	SYBR		Unkn-05	L7B (27)	22.38	22.46	0.128	70270	4.847	66900	5340		F6B (35)	92100
F04	SYBR		Unkn-06	L11B (31)	22.58	22.51	0.066	61790	4.791	64900	2670		F7B (10)	72100
F05	SYBR		Unkn-06	L11B (31)	22.47	22.51	0.066	66500	4.823	64900	2670		F8B (36)	64700
F06	SYBR		Unkn-06	L11B (31)	22.47	22.51	0.066	66320	4.822	64900	2670		F13B (39)	65500
G04	SYBR		Unkn-07	L1A (5)	22.69	22.68	0.006	57670	4.761	57800	235		F4A (16)	80600
G05	SYBR		Unkn-07	L1A (5)	22.68	22.68	0.006	58100	4.764	57800	235		F5A (2)	85800
G06	SYBR		Unkn-07	L1A (5)	22.69	22.68	0.006	57730	4.761	57800	235		F6A (3)	44200
H04	SYBR		Unkn-08	L3A (7)	22.51	22.4	0.103	64590	4.81	69500	4500		F7A (4)	76400
H05	SYBR		Unkn-08	L3A (7)	22.31	22.4	0.103	73370	4.866	69500	4500		F8A (17)	76800
H06	SYBR		Unkn-08	L3A (7)	22.37	22.4	0.103	70670	4.849	69500	4500		F13A (19)	59500
A07	SYBR		Unkn-09	L4A (8)	22.64	22.67	0.09	59380	4.774	58400	3320			Mean
A08	SYBR		Unkn-09	L4A (8)	22.77	22.67	0.09	54760	4.738	58400	3320		Lean Control	63868.9
A09	SYBR		Unkn-09	L4A (8)	22.6	22.67	0.09	61200	4.787	58400	3320		Lean Trained	61483.3
B07	SYBR		Unkn-10	L5A (11)	22.27	22.32	0.048	75280	4.877	72900	2240		Obese Control	77116.7
B08	SYBR		Unkn-10	L5A (11)	22.37	22.32	0.048	70870	4.85	72900	2240		Obese Trained	70550
B09	SYBR		Unkn-10	L5A (11)	22.33	22.32	0.048	72420	4.86	72900	2240			SD
C07	SYBR		Unkn-11	L7A (13)	22.59	22.58	0.069	61340	4.788	61900	2740		Lean Control	7428.72
C08	SYBR		Unkn-11	L7A (13)	22.5	22.58	0.069	64870	4.812	61900	2740		Lean Trained	8820.75
C09	SYBR		Unkn-11	L7A (13)	22.64	22.58	0.069	59480	4.774	61900	2740		Obese Control	11753.9
D07	SYBR		Unkn-12	L11A (9)	23.01	22.96	0.04	47030	4.672	48400	1220		Obese Trained	15641.5
D08	SYBR		Unkn-12	L11A (9)	22.94	22.96	0.04	49270	4.693	48400	1220
D09	SYBR		Unkn-12	L11A (9)	22.95	22.96	0.04	48980	4.69	48400	1220
E07	SYBR		Unkn-13	F4B (33)	22.2	22.2	0.037	78950	4.897	79000	1850
E08	SYBR		Unkn-13	F4B (33)	22.23	22.2	0.037	77190	4.888	79000	1850
E09	SYBR		Unkn-13	F4B (33)	22.16	22.2	0.037	80890	4.908	79000	1850
F07	SYBR		Unkn-14	F5B (34)	21.94	22	0.054	92650	4.967	89300	3090
F08	SYBR		Unkn-14	F5B (34)	22.05	22	0.054	86530	4.937	89300	3090
F09	SYBR		Unkn-14	F5B (34)	22.01	22	0.054	88760	4.948	89300	3090
G07	SYBR		Unkn-15	F6B (35)	22.06	21.96	0.102	85970	4.934	92100	5980
G08	SYBR		Unkn-15	F6B (35)	21.95	21.96	0.102	92490	4.966	92100	5980
G09	SYBR		Unkn-15	F6B (35)	21.86	21.96	0.102	97920	4.991	92100	5980
H07	SYBR		Unkn-16	F7B (10)	22.35	22.34	0.027	71480	4.854	72100	1240
H08	SYBR		Unkn-16	F7B (10)	22.31	22.34	0.027	73570	4.867	72100	1240
H09	SYBR		Unkn-16	F7B (10)	22.36	22.34	0.027	71340	4.853	72100	1240
A10	SYBR		Unkn-17	F8B (36)	22.52	22.51	0.14	64420	4.809	64700	5770
A11	SYBR		Unkn-17	F8B (36)	22.37	22.51	0.14	70580	4.849	64700	5770
A12	SYBR		Unkn-17	F8B (36)	22.65	22.51	0.14	59050	4.771	64700	5770
B10	SYBR		Unkn-18	F13B (39)	22.43	22.49	0.093	68140	4.833	65500	3820
B11	SYBR		Unkn-18	F13B (39)	22.45	22.49	0.093	67150	4.827	65500	3820
B12	SYBR		Unkn-18	F13B (39)	22.6	22.49	0.093	61090	4.786	65500	3820
C10	SYBR		Unkn-19	F4A (16)	22.07	22.18	0.289	85710	4.933	80600	14100
C11	SYBR		Unkn-19	F4A (16)	21.97	22.18	0.289	91430	4.961	80600	14100
C12	SYBR		Unkn-19	F4A (16)	22.51	22.18	0.289	64700	4.811	80600	14100
D10	SYBR		Unkn-20	F5A (2)	22.1	22.07	0.036	84150	4.925	85800	1990
D11	SYBR		Unkn-20	F5A (2)	22.03	22.07	0.036	88020	4.945	85800	1990
D12	SYBR		Unkn-20	F5A (2)	22.08	22.07	0.036	85260	4.931	85800	1990
E10	SYBR		Unkn-21	F6A (3)	23.08	23.11	0.098	44890	4.652	44200	2710
E11	SYBR		Unkn-21	F6A (3)	23.03	23.11	0.098	46520	4.668	44200	2710
E12	SYBR		Unkn-21	F6A (3)	23.22	23.11	0.098	41220	4.615	44200	2710
F10	SYBR		Unkn-22	F7A (4)	22.48	22.26	0.208	65730	4.818	76400	9890
F11	SYBR		Unkn-22	F7A (4)	22.07	22.26	0.208	85290	4.931	76400	9890
F12	SYBR		Unkn-22	F7A (4)	22.21	22.26	0.208	78090	4.893	76400	9890
G10	SYBR		Unkn-23	F8A (17)	22.27	22.24	0.028	75350	4.877	76800	1360
G11	SYBR		Unkn-23	F8A (17)	22.21	22.24	0.028	78010	4.892	76800	1360
G12	SYBR		Unkn-23	F8A (17)	22.23	22.24	0.028	77170	4.887	76800	1360
H10	SYBR		Unkn-24	F13A (19)	22.62	22.64	0.015	60090	4.779	59500	559
H11	SYBR		Unkn-24	F13A (19)	22.65	22.64	0.015	59220	4.772	59500	559
H12	SYBR		Unkn-24	F13A (19)	22.65	22.64	0.015	59050	4.771	59500	559

## Sheet: Ldha
Well	Fluor	Target	Content	Sample	Cq	Cq Mean	Cq Std. Dev	Starting Quantity (SQ)	Log Starting Quantity	SQ Mean	SQ Std. Dev
A01	SYBR		NTC-01		39.24	39.5	0.364	N/A	N/A	N/A	N/A
A02	SYBR		NTC-01		39.75	39.5	0.364	N/A	N/A	N/A	N/A
A03	SYBR		NTC-01		N/A	0	0	N/A	N/A	0	0
B01	SYBR		Std-01	Ldha	34.31	34.63	0.447	69.4	1.841	69.4	0
B02	SYBR		Std-01	Ldha	34.95	34.63	0.447	69.4	1.841	69.4	0
C01	SYBR		Std-02	Ldha	31.56	31.24	0.278	694	2.841	694	0
C02	SYBR		Std-02	Ldha	31.09	31.24	0.278	694	2.841	694	0
C03	SYBR		Std-02	Ldha	31.08	31.24	0.278	694	2.841	694	0
D01	SYBR		Std-03	Ldha	27.36	27.28	0.066	6940	3.841	6940	0
D02	SYBR		Std-03	Ldha	27.23	27.28	0.066	6940	3.841	6940	0
D03	SYBR		Std-03	Ldha	27.26	27.28	0.066	6940	3.841	6940	0
E01	SYBR		Std-04	Ldha	23.33	23.23	0.087	69400	4.841	69400	0
E02	SYBR		Std-04	Ldha	23.17	23.23	0.087	69400	4.841	69400	0
E03	SYBR		Std-04	Ldha	23.19	23.23	0.087	69400	4.841	69400	0
F01	SYBR		Std-05	Ldha	19.62	19.55	0.088	694000	5.841	694000	0
F02	SYBR		Std-05	Ldha	19.58	19.55	0.088	694000	5.841	694000	0
F03	SYBR		Std-05	Ldha	19.45	19.55	0.088	694000	5.841	694000	0			Ldha
B04	SYBR		Unkn	L3B (24)	19.62	19.62	0	659200	5.819	659000	0		L3B (24)	690567
B05	SYBR		Unkn	L3B (24)	19.52	19.52	0	702000	5.846	702000	0		L1B (22)	535800
B06	SYBR		Unkn	L3B (24)	19.5	19.5	0	710500	5.852	710000	0		L4B (25)	863000
A04	SYBR		Unkn-01	L1B (22)	20.07	19.97	0.089	503300	5.702	536000	28200		L5B (26)	631000
A05	SYBR		Unkn-01	L1B (22)	19.92	19.97	0.089	552500	5.742	536000	28200		L7B (27)	688000
A06	SYBR		Unkn-01	L1B (22)	19.92	19.97	0.089	551600	5.742	536000	28200		L11B (31)	651000
C04	SYBR		Unkn-03	L4B (25)	19.21	19.18	0.036	847300	5.928	863000	18700		L1A (5)	588000
C05	SYBR		Unkn-03	L4B (25)	19.19	19.18	0.036	857500	5.933	863000	18700		L3A (7)	558000
C06	SYBR		Unkn-03	L4B (25)	19.14	19.18	0.036	883600	5.946	863000	18700		L4A (8)	735000
D04	SYBR		Unkn-04	L5B (26)	19.82	19.7	0.106	586500	5.768	631000	39600		L5A (11)	771000
D05	SYBR		Unkn-04	L5B (26)	19.66	19.7	0.106	643100	5.808	631000	39600		L7A (13)	673000
D06	SYBR		Unkn-04	L5B (26)	19.61	19.7	0.106	662900	5.821	631000	39600		L11A (9)	796000
E04	SYBR		Unkn-05	L7B (27)	19.68	19.55	0.113	635800	5.803	688000	45600		F4B (33)	541000
E05	SYBR		Unkn-05	L7B (27)	19.48	19.55	0.113	716200	5.855	688000	45600		F5B (34)	710000
E06	SYBR		Unkn-05	L7B (27)	19.49	19.55	0.113	713300	5.853	688000	45600		F6B (35)	825000
F04	SYBR		Unkn-06	L11B (31)	19.72	19.65	0.071	622800	5.794	651000	27900		F7B (10)	622000
F05	SYBR		Unkn-06	L11B (31)	19.57	19.65	0.071	678700	5.832	651000	27900		F8B (36)	475000
F06	SYBR		Unkn-06	L11B (31)	19.64	19.65	0.071	651300	5.814	651000	27900		F13B (39)	681000
G04	SYBR		Unkn-07	L1A (5)	19.83	19.81	0.027	581700	5.765	588000	9610		F4A (16)	692000
G05	SYBR		Unkn-07	L1A (5)	19.83	19.81	0.027	583200	5.766	588000	9610		F5A (2)	992000
G06	SYBR		Unkn-07	L1A (5)	19.78	19.81	0.027	599000	5.777	588000	9610		F6A (3)	715000
H04	SYBR		Unkn-08	L3A (7)	19.99	19.9	0.081	527800	5.723	558000	26800		F7A (4)	783000
H05	SYBR		Unkn-08	L3A (7)	19.84	19.9	0.081	578900	5.763	558000	26800		F8A (17)	818000
H06	SYBR		Unkn-08	L3A (7)	19.87	19.9	0.081	567600	5.754	558000	26800		F13A (19)	778000
A07	SYBR		Unkn-09	L4A (8)	19.41	19.44	0.052	747200	5.873	735000	22700			Mean
A08	SYBR		Unkn-09	L4A (8)	19.5	19.44	0.052	708400	5.85	735000	22700		Lean Control	676561
A09	SYBR		Unkn-09	L4A (8)	19.41	19.44	0.052	748300	5.874	735000	22700		Lean Trained	686833
B07	SYBR		Unkn-10	L5A (11)	19.33	19.36	0.04	786200	5.896	771000	18200		Obese Control	642333
B08	SYBR		Unkn-10	L5A (11)	19.35	19.36	0.04	774900	5.889	771000	18200		Obese Trained	796333
B09	SYBR		Unkn-10	L5A (11)	19.41	19.36	0.04	750600	5.875	771000	18200			SD
C07	SYBR		Unkn-11	L7A (13)	19.6	19.59	0.067	667500	5.824	673000	27300		Lean Control	107359
C08	SYBR		Unkn-11	L7A (13)	19.52	19.59	0.067	702800	5.847	673000	27300		Lean Trained	97855.8
C09	SYBR		Unkn-11	L7A (13)	19.65	19.59	0.067	649200	5.812	673000	27300		Obese Control	124999
D07	SYBR		Unkn-12	L11A (9)	19.36	19.31	0.044	772500	5.888	796000	21100		Obese Trained	106555
D08	SYBR		Unkn-12	L11A (9)	19.27	19.31	0.044	813200	5.91	796000	21100
D09	SYBR		Unkn-12	L11A (9)	19.3	19.31	0.044	802500	5.904	796000	21100
E07	SYBR		Unkn-13	F4B (33)	19.92	19.95	0.029	552200	5.742	541000	9410
E08	SYBR		Unkn-13	F4B (33)	19.97	19.95	0.029	535600	5.729	541000	9410
E09	SYBR		Unkn-13	F4B (33)	19.97	19.95	0.029	536200	5.729	541000	9410
F07	SYBR		Unkn-14	F5B (34)	19.46	19.5	0.036	726900	5.861	710000	15500
F08	SYBR		Unkn-14	F5B (34)	19.51	19.5	0.036	706700	5.849	710000	15500
F09	SYBR		Unkn-14	F5B (34)	19.53	19.5	0.036	696400	5.843	710000	15500
G07	SYBR		Unkn-15	F6B (35)	19.31	19.25	0.054	795600	5.901	825000	26600
G08	SYBR		Unkn-15	F6B (35)	19.24	19.25	0.054	831500	5.92	825000	26600
G09	SYBR		Unkn-15	F6B (35)	19.2	19.25	0.054	847600	5.928	825000	26600
H07	SYBR		Unkn-16	F7B (10)	19.73	19.72	0.026	617900	5.791	622000	9870
H08	SYBR		Unkn-16	F7B (10)	19.69	19.72	0.026	633700	5.802	622000	9870
H09	SYBR		Unkn-16	F7B (10)	19.74	19.72	0.026	615500	5.789	622000	9870
A10	SYBR		Unkn-17	F8B (36)	20.17	20.17	0.045	475900	5.678	475000	12900
A11	SYBR		Unkn-17	F8B (36)	20.12	20.17	0.045	487900	5.688	475000	12900
A12	SYBR		Unkn-17	F8B (36)	20.21	20.17	0.045	462200	5.665	475000	12900
B10	SYBR		Unkn-18	F13B (39)	19.51	19.57	0.092	705500	5.848	681000	37200
B11	SYBR		Unkn-18	F13B (39)	19.52	19.57	0.092	699700	5.845	681000	37200
B12	SYBR		Unkn-18	F13B (39)	19.68	19.57	0.092	638400	5.805	681000	37200
C10	SYBR		Unkn-19	F4A (16)	19.51	19.54	0.061	705600	5.849	692000	25000
C11	SYBR		Unkn-19	F4A (16)	19.5	19.54	0.061	708100	5.85	692000	25000
C12	SYBR		Unkn-19	F4A (16)	19.61	19.54	0.061	663600	5.822	692000	25000
D10	SYBR		Unkn-20	F5A (2)	18.97	18.94	0.064	974400	5.989	992000	38200
D11	SYBR		Unkn-20	F5A (2)	18.87	18.94	0.064	1036000	6.015	992000	38200
D12	SYBR		Unkn-20	F5A (2)	18.99	18.94	0.064	965500	5.985	992000	38200
E10	SYBR		Unkn-21	F6A (3)	19.48	19.49	0.085	720100	5.857	715000	36400
E11	SYBR		Unkn-21	F6A (3)	19.41	19.49	0.085	748300	5.874	715000	36400
E12	SYBR		Unkn-21	F6A (3)	19.58	19.49	0.085	676000	5.83	715000	36400
F10	SYBR		Unkn-22	F7A (4)	19.61	19.35	0.243	663800	5.822	783000	112000
F11	SYBR		Unkn-22	F7A (4)	19.13	19.35	0.243	885500	5.947	783000	112000
F12	SYBR		Unkn-22	F7A (4)	19.3	19.35	0.243	800900	5.904	783000	112000
G10	SYBR		Unkn-23	F8A (17)	19.27	19.26	0.037	816400	5.912	818000	18100
G11	SYBR		Unkn-23	F8A (17)	19.23	19.26	0.037	837100	5.923	818000	18100
G12	SYBR		Unkn-23	F8A (17)	19.3	19.26	0.037	801200	5.904	818000	18100
H10	SYBR		Unkn-24	F13A (19)	19.34	19.35	0.023	779100	5.892	778000	10500
H11	SYBR		Unkn-24	F13A (19)	19.33	19.35	0.023	787300	5.896	778000	10500
H12	SYBR		Unkn-24	F13A (19)	19.37	19.35	0.023	766400	5.884	778000	10500

## Sheet: Hprt
Well	Fluor	Target	Content	Sample	Cq	Cq Mean	Cq Std. Dev	Starting Quantity (SQ)	Log Starting Quantity	SQ Mean	SQ Std. Dev
A01	SYBR		NTC-01		N/A	0	0	N/A	N/A	0	0
A02	SYBR		NTC-01		N/A	0	0	N/A	N/A	0	0
A03	SYBR		NTC-01		N/A	0	0	N/A	N/A	0	0
B03	SYBR		Std-01	HPRT	33.46	33.46	0	67.2	1.827	67.2	0
C02	SYBR		Std-02	HPRT	30.75	30.77	0.041	672	2.827	672	0
C03	SYBR		Std-02	HPRT	30.8	30.77	0.041	672	2.827	672	0
D01	SYBR		Std-03	HPRT	26.9	26.72	0.178	6720	3.827	6720	0
D02	SYBR		Std-03	HPRT	26.55	26.72	0.178	6720	3.827	6720	0
D03	SYBR		Std-03	HPRT	26.7	26.72	0.178	6720	3.827	6720	0
E02	SYBR		Std-04	HPRT	22.44	22.47	0.043	67200	4.827	67200	0
E03	SYBR		Std-04	HPRT	22.5	22.47	0.043	67200	4.827	67200	0
F01	SYBR		Std-05	HPRT	18.7	18.57	0.139	672000	5.827	672000	0
F02	SYBR		Std-05	HPRT	18.59	18.57	0.139	672000	5.827	672000	0
F03	SYBR		Std-05	HPRT	18.42	18.57	0.139	672000	5.827	672000	0			HPRT
B04	SYBR		Unkn	L3B (24)	22.65	22.65	0	64910	4.812	64900	0		L3B (24)	68150
B05	SYBR		Unkn	L3B (24)	22.52	22.52	0	69790	4.844	69800	0		L1B (22)	75440
B06	SYBR		Unkn	L3B (24)	22.53	22.53	0	69750	4.844	69700	0		L4B (25)	82400
A04	SYBR		Unkn-01	L1B (22)	22.44	22.39	0.052	73280	4.865	75400	2330		L5B (26)	89600
A05	SYBR		Unkn-01	L1B (22)	22.4	22.39	0.052	75140	4.876	75400	2330		L7B (27)	76300
A06	SYBR		Unkn-01	L1B (22)	22.34	22.39	0.052	77900	4.892	75400	2330		L11B (31)	59600
C04	SYBR		Unkn-03	L4B (25)	22.29	22.24	0.052	80070	4.903	82400	2540		L1A (5)	93700
C05	SYBR		Unkn-03	L4B (25)	22.25	22.24	0.052	81920	4.913	82400	2540		L3A (7)	77900
C06	SYBR		Unkn-03	L4B (25)	22.19	22.24	0.052	85080	4.93	82400	2540		L4A (8)	80900
D04	SYBR		Unkn-04	L5B (26)	22.15	22.1	0.042	87110	4.94	89600	2190		L5A (11)	76200
D05	SYBR		Unkn-04	L5B (26)	22.08	22.1	0.042	90700	4.958	89600	2190		L7A (13)	93000
D06	SYBR		Unkn-04	L5B (26)	22.07	22.1	0.042	91090	4.959	89600	2190		L11A (9)	81700
E04	SYBR		Unkn-05	L7B (27)	22.47	22.38	0.084	72020	4.857	76300	3740		F4B (33)	85000
E05	SYBR		Unkn-05	L7B (27)	22.31	22.38	0.084	79090	4.898	76300	3740		F5B (34)	88500
E06	SYBR		Unkn-05	L7B (27)	22.34	22.38	0.084	77670	4.89	76300	3740		F6B (35)	84400
F04	SYBR		Unkn-06	L11B (31)	22.91	22.79	0.102	55560	4.745	59600	3520		F7B (10)	82600
F05	SYBR		Unkn-06	L11B (31)	22.74	22.79	0.102	61550	4.789	59600	3520		F8B (36)	77000
F06	SYBR		Unkn-06	L11B (31)	22.73	22.79	0.102	61750	4.791	59600	3520		F13B (39)	78900
G04	SYBR		Unkn-07	L1A (5)	22.03	22.02	0.007	93490	4.971	93700	363		F4A (16)	80000
G05	SYBR		Unkn-07	L1A (5)	22.02	22.02	0.007	94150	4.974	93700	363		F5A (2)	99700
G06	SYBR		Unkn-07	L1A (5)	22.03	22.02	0.007	93560	4.971	93700	363		F6A (3)	133000
H04	SYBR		Unkn-08	L3A (7)	22.39	22.34	0.046	75490	4.878	77900	2080		F7A (4)	88900
H05	SYBR		Unkn-08	L3A (7)	22.32	22.34	0.046	78680	4.896	77900	2080		F8A (17)	80800
H06	SYBR		Unkn-08	L3A (7)	22.31	22.34	0.046	79390	4.9	77900	2080		F13A (19)	80800
A07	SYBR		Unkn-09	L4A (8)	22.24	22.28	0.08	82420	4.916	80900	3750			Mean
A08	SYBR		Unkn-09	L4A (8)	22.37	22.28	0.08	76590	4.884	80900	3750		Lean Control	75248.3
A09	SYBR		Unkn-09	L4A (8)	22.22	22.28	0.08	83610	4.922	80900	3750		Lean Trained	83900
B07	SYBR		Unkn-10	L5A (11)	22.33	22.38	0.039	78220	4.893	76200	1780		Obese Control	82733.3
B08	SYBR		Unkn-10	L5A (11)	22.41	22.38	0.039	74860	4.874	76200	1780		Obese Trained	93866.7
B09	SYBR		Unkn-10	L5A (11)	22.39	22.38	0.039	75530	4.878	76200	1780			SD
C07	SYBR		Unkn-11	L7A (13)	22.04	22.04	0.036	92700	4.967	93000	1960		Lean Control	10521.6
C08	SYBR		Unkn-11	L7A (13)	22	22.04	0.036	95130	4.978	93000	1960		Lean Trained	7589.2
C09	SYBR		Unkn-11	L7A (13)	22.07	22.04	0.036	91240	4.96	93000	1960		Obese Control	4213.15
D07	SYBR		Unkn-12	L11A (9)	22.29	22.26	0.032	79940	4.903	81700	1540		Obese Trained	20610.1
D08	SYBR		Unkn-12	L11A (9)	22.23	22.26	0.032	82900	4.919	81700	1540
D09	SYBR		Unkn-12	L11A (9)	22.25	22.26	0.032	82150	4.915	81700	1540
E07	SYBR		Unkn-13	F4B (33)	22.18	22.19	0.011	85550	4.932	85000	547
E08	SYBR		Unkn-13	F4B (33)	22.2	22.19	0.011	84460	4.927	85000	547
E09	SYBR		Unkn-13	F4B (33)	22.19	22.19	0.011	85090	4.93	85000	547
F07	SYBR		Unkn-14	F5B (34)	22.07	22.12	0.046	91170	4.96	88500	2400
F08	SYBR		Unkn-14	F5B (34)	22.14	22.12	0.046	87720	4.943	88500	2400
F09	SYBR		Unkn-14	F5B (34)	22.16	22.12	0.046	86560	4.937	88500	2400
G07	SYBR		Unkn-15	F6B (35)	22.27	22.2	0.057	81260	4.91	84400	2810
G08	SYBR		Unkn-15	F6B (35)	22.19	22.2	0.057	85190	4.93	84400	2810
G09	SYBR		Unkn-15	F6B (35)	22.16	22.2	0.057	86690	4.938	84400	2810
H07	SYBR		Unkn-16	F7B (10)	22.24	22.24	0.05	82620	4.917	82600	2450
H08	SYBR		Unkn-16	F7B (10)	22.19	22.24	0.05	85050	4.93	82600	2450
H09	SYBR		Unkn-16	F7B (10)	22.29	22.24	0.05	80150	4.904	82600	2450
A10	SYBR		Unkn-17	F8B (36)	22.28	22.37	0.188	80390	4.905	77000	8270
A11	SYBR		Unkn-17	F8B (36)	22.23	22.37	0.188	82990	4.919	77000	8270
A12	SYBR		Unkn-17	F8B (36)	22.58	22.37	0.188	67550	4.83	77000	8270
B10	SYBR		Unkn-18	F13B (39)	22.32	22.32	0.038	78810	4.897	78900	1750
B11	SYBR		Unkn-18	F13B (39)	22.28	22.32	0.038	80680	4.907	78900	1750
B12	SYBR		Unkn-18	F13B (39)	22.35	22.32	0.038	77180	4.887	78900	1750
C10	SYBR		Unkn-19	F4A (16)	22.29	22.29	0.056	80350	4.905	80000	2640
C11	SYBR		Unkn-19	F4A (16)	22.24	22.29	0.056	82430	4.916	80000	2640
C12	SYBR		Unkn-19	F4A (16)	22.35	22.29	0.056	77200	4.888	80000	2640
D10	SYBR		Unkn-20	F5A (2)	21.96	21.92	0.088	97380	4.988	99700	5270
D11	SYBR		Unkn-20	F5A (2)	21.82	21.92	0.088	105800	5.024	99700	5270
D12	SYBR		Unkn-20	F5A (2)	21.98	21.92	0.088	96050	4.983	99700	5270
E10	SYBR		Unkn-21	F6A (3)	21.43	21.43	0.058	132800	5.123	133000	4580
E11	SYBR		Unkn-21	F6A (3)	21.37	21.43	0.058	137500	5.138	133000	4580
E12	SYBR		Unkn-21	F6A (3)	21.49	21.43	0.058	128400	5.108	133000	4580
F10	SYBR		Unkn-22	F7A (4)	22.14	22.12	0.078	87360	4.941	88900	4120
F11	SYBR		Unkn-22	F7A (4)	22.03	22.12	0.078	93560	4.971	88900	4120
F12	SYBR		Unkn-22	F7A (4)	22.18	22.12	0.078	85760	4.933	88900	4120
G10	SYBR		Unkn-23	F8A (17)	22.27	22.28	0.028	81230	4.91	80800	1310
G11	SYBR		Unkn-23	F8A (17)	22.25	22.28	0.028	81880	4.913	80800	1310
G12	SYBR		Unkn-23	F8A (17)	22.31	22.28	0.028	79360	4.9	80800	1310
H10	SYBR		Unkn-24	F13A (19)	22.28	22.28	0.037	80810	4.907	80800	1740
H11	SYBR		Unkn-24	F13A (19)	22.24	22.28	0.037	82550	4.917	80800	1740
H12	SYBR		Unkn-24	F13A (19)	22.31	22.28	0.037	79070	4.898	80800	1740
