# Supplementary material for: Effect of obesity and exercise on the expression of the novel myokines, Myonectin and Fibronectin type III domain containing 5
Source: PeerJ. 2014 Sep 30;2:e605. doi: 10.7717/peerj.605 (PMC4184026; doi:10.7717/peerj.605)
Supplement: Supplemental Information 2 — Raw data of PCR array exported to excel. [file peerj-02-605-s002.xlsx]

## Sheet: Layout
Pooled cDNA data for determining appropiate housekeeping genes (reference genes)
Animal coding Key
F=	Obese zucker rat
L=	Lean Zucker rat
A=	Exercised
B =	Control
Please make 4 separate pooled samples: LA, LB, FA, and FB
include the following samples in each pool:
LA	L1A, L4A, L5A, L10A, L11A
LB	L1B, L4B, L5B, L10B, L11B
FA	F5A, F6A, F7A, & F13A
FB	F5B, F6B, F7B, & F13B
2 plates of Housekeeping genes, 12 genes on each plate.
Symbol		Description
Actb		Actin, beta
B2m		Beta-2 microglobulin
Hprt1		Hypoxanthine phosphoribosyltransferase 1
Hsp90ab1		Heat shock protein 90 alpha (cytosolic), class B member 1
Ldha		Lactate dehydrogenase A
Nono		Non-POU domain containing, octamer-binding
Pgk1		Phosphoglycerate kinase 1
Ppih		Peptidylprolyl isomerase H (cyclophilin H)
Rplp1		Ribosomal protein, large, P1
Sdha		Succinate dehydrogenase complex, subunit A, flavoprotein (Fp)
Tbp		TATA box binding protein
Tfrc		Transferrin receptor
Array Layout:
A	Actb	B2m	Hprt1	Hsp90ab1	Ldha	Nono	Pgk1	Ppih	Rplp1	Sdha	Tbp	Tfrc
B	Actb	B2m	Hprt1	Hsp90ab1	Ldha	Nono	Pgk1	Ppih	Rplp1	Sdha	Tbp	Tfrc
C	Actb	B2m	Hprt1	Hsp90ab1	Ldha	Nono	Pgk1	Ppih	Rplp1	Sdha	Tbp	Tfrc
D	Actb	B2m	Hprt1	Hsp90ab1	Ldha	Nono	Pgk1	Ppih	Rplp1	Sdha	Tbp	Tfrc
E	Actb	B2m	Hprt1	Hsp90ab1	Ldha	Nono	Pgk1	Ppih	Rplp1	Sdha	Tbp	Tfrc
G	Actb	B2m	Hprt1	Hsp90ab1	Ldha	Nono	Pgk1	Ppih	Rplp1	Sdha	Tbp	Tfrc
H	Actb	B2m	Hprt1	Hsp90ab1	Ldha	Nono	Pgk1	Ppih	Rplp1	Sdha	Tbp	Tfrc

## Sheet: Raw data
Gene	Group	Cq
Actin,Beta	FA	17.94	0.06583
B2M	FA	18.05	0.08116
HPRT	FA	21.5	0.00155
Hsp90	FA	18.2	0.00165
Ldha	FA	19.2	0.04181
Nono	FA	22.54	0.00145
Pgk1	FA	19.1	0.01189
Ppih	FA	24.72	0.00189
Rplp1	FA	18.25	0.01607
Sdha	FA	19.25	0.00816
Tbp	FA	24.7	0.02997
Tfrc	FA	22.19	0.02322
Actin,Beta	FB	18.81	0.08678
B2M	FB	18.49	0.08316
HPRT	FB	21.75	0.02416
Hsp90	FB	18.33	0.07655
Ldha	FB	19.08	0.01457
Nono	FB	23.05	0.02458
Pgk1	FB	18.96	0.05403
Ppih	FB	25.01	0.00678
Rplp1	FB	18.66	0.02423
Sdha	FB	19.2	0.02018
Tbp	FB	25.28	0.00571
Tfrc	FB	22.58	0.00393
Actin,Beta	LA	19.34	0.09776
B2M	LA	18.99	0.04347
HPRT	LA	22.1	0.06572
Hsp90	LA	18.69	0.06147
Ldha	LA	19.27	0.05904
Nono	LA	23.32	0.04681
Pgk1	LA	19.02	0.09304
Ppih	LA	25.33	0.02611
Rplp1	LA	18.69	0.07016
Sdha	LA	19.53	0.05464
Tbp	LA	25.25	0.04782
Tfrc	LA	23.06	0.04894
Actin,Beta	LB	19.28	0.03621
B2M	LB	19	0.04766
HPRT	LB	21.87	0.04795
Hsp90	LB	18.4	0.05383
Ldha	LB	19.15	0.01276
Nono	LB	23.12	0.01905
Pgk1	LB	18.74	0.01907
Ppih	LB	24.97	0.06002
Rplp1	LB	18.67	0.16281
Sdha	LB	19.39	0.01425
Tbp	LB	25.55	0.06283
Tfrc	LB	23.32	0.05243
